## CORRECTION

# Correction: The Maya Preclassic to Classic transition observed through faunal trends from Ceibal, Guatemala

The *PLOS ONE* Staff

## Notice of Republication

This article was republished on April 17, 2020, to remove Supporting Information files that were incorrectly included in the originally published article. The publisher apologizes for the errors. Please download this article again to view the correct version.

## Reference

1. Sharpe AE, Inomata T, Triadan D, Burham M, MacLellan J, Munson J, et al. (2020) The Maya Preclassic to Classic transition observed through faunal trends from Ceibal, Guatemala. *PLoS ONE* 15(4): e0230892. <https://doi.org/10.1371/journal.pone.0230892> PMID: 32255773

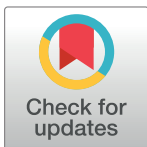

## OPEN ACCESS

**Citation:** The *PLOS ONE* Staff (2020) Correction: The Maya Preclassic to Classic transition observed through faunal trends from Ceibal, Guatemala. *PLoS ONE* 15(5): e0233193. <https://doi.org/10.1371/journal.pone.0233193>

**Published:** May 8, 2020

**Copyright:** © 2020 The PLOS ONE Staff. This is an open access article distributed under the terms of the [Creative Commons Attribution License](https://creativecommons.org/licenses/by/4.0/), which permits unrestricted use, distribution, and reproduction in any medium, provided the original author and source are credited.
